# Supplementary material
Source: ML conference proceedings conference paper supplement (https://proceedings.neurips.cc/paper_files/paper/2022/hash/3a02da3fdfd592d9a5273101c3546611-Abstract.html)
Supplement: Supplementary file 1 [file 3a02da3fdfd592d9a5273101c3546611-Supplemental-Conference.zip]

Archive with 2 entries (2 files):
- human_ai_shared_control_via_fr-Supplementary Material (1)/appendix.pdf
- human_ai_shared_control_via_fr-Supplementary Material (1)/policydissect-main.zip
